# Supplementary material
Source: PubMed Central journal article supplement (PMC6679350)
Supplement: jexbio-222-202093-s1.pdf [file jexbio-222-202093-s1.pdf]

## FULL BODY MODEL – DESCRIPTION

**Table S1. Model Fundamentals**

|                             |                                                                                                                                                                                                                                                         |
|-----------------------------|---------------------------------------------------------------------------------------------------------------------------------------------------------------------------------------------------------------------------------------------------------|
| <b>Design</b>               | In house developed full body model and location protocol.                                                                                                                                                                                               |
| <b>Degrees of freedom</b>   | All joints/segments : 6                                                                                                                                                                                                                                 |
| <b>Optimisation</b>         | Segment optimisation - Software generic.<br>See Visual 3D documentation at <a href="http://www.c-motion.com/v3dwiki/index.php?title=Six_Degrees_of_Freedom">http://www.c-motion.com/v3dwiki/index.php?title=Six_Degrees_of_Freedom</a> and <sup>1</sup> |
| <b>Kinetic calculations</b> | Mass, moments of inertia and center of gravity calculated according to <sup>2</sup> (see Visual 3D documentation at <a href="http://c-motion.com/v3dwiki/index.php/Segment_Geometry">http://c-motion.com/v3dwiki/index.php/Segment_Geometry</a> )       |

**Table S2. Landmarks**

| Landmark ID<br>(^bilateral/side) | Location                                                                                                                                                                                                                                                                                                                                                                                                                                                                                       | Location method | Function   |          | Type    |
|----------------------------------|------------------------------------------------------------------------------------------------------------------------------------------------------------------------------------------------------------------------------------------------------------------------------------------------------------------------------------------------------------------------------------------------------------------------------------------------------------------------------------------------|-----------------|------------|----------|---------|
|                                  |                                                                                                                                                                                                                                                                                                                                                                                                                                                                                                |                 | Definition | Tracking |         |
| ^ASI                             | Superficial on skin surface such that marker body is anterior to prominent anterior edge of iliac crest.                                                                                                                                                                                                                                                                                                                                                                                       | Palpation       | Yes        | Yes      | Marker  |
| ^PSI                             | Superficial to palpable prominence at posterior edge of iliac crest.                                                                                                                                                                                                                                                                                                                                                                                                                           | Palpation       | No         | Yes      | Marker  |
| ^ASI2                            | Superficial and lateral to proximal border of iliac crest.                                                                                                                                                                                                                                                                                                                                                                                                                                     | Palpation       | No         | Yes      | Marker  |
| ^VPSI                            | PSI projected by half marker radius perpendicular to contralateral PSI in plane connecting PSIs and mid point between ASIs.                                                                                                                                                                                                                                                                                                                                                                    | Calculation     | Yes        | No       | Derived |
| ^VASI                            | ASI projected by half marker radius perpendicular to contralateral ASI in plane connecting ASIs and mid point between PSIs.                                                                                                                                                                                                                                                                                                                                                                    | Calculation     | Yes        | No       | Derived |
| ^HJC                             | Hip joint centre – at the following distances from mid-point between VASI markers (Pelvis origin) in pelvis coordinate system (see Pelvis):<br>AP (in mm) = -0.24PD - 9.9<br>ML (in mm) = 0.28PD + 0.16PW + 7.9<br>Axial (in mm) = -0.16PW - 0.04LL - 7.1<br><br>Where PD = Pelvic depth: the distance between the mid points of VASIs and VPSIs<br>PW = Pelvic width : distance between left and right VASIs<br>LL = Leg Length : distance between the ASI and VANM via the VKNM <sup>3</sup> | Calculation     | Yes        | No       | Derived |

| Landmark ID<br>(^bilateral/side) | Location                                                                                                                                                                                    | Location<br>method          | Function        |          | Type    |
|----------------------------------|---------------------------------------------------------------------------------------------------------------------------------------------------------------------------------------------|-----------------------------|-----------------|----------|---------|
|                                  |                                                                                                                                                                                             |                             | Definition      | Tracking |         |
| ^TRO                             | Lateral and superficial to the centre of the palpated prominence of the greater trochanter when standing in calibration posture.                                                            | Palpation                   | No              | Yes      | Marker  |
| ^TH1                             | Anteriorly on thigh, approximately 1/3 distance between hip and knee.                                                                                                                       | Visualisation               | No              | Yes      | Marker  |
| ^TH2                             | Anteriorly on thigh, 50mm (approx.) above the patella when relaxed in standing.                                                                                                             | Visualisation               | No              | Yes      | Marker  |
| ^TH3                             | Laterally on thigh, approximately mid distance between hip and knee                                                                                                                         | Visualisation               | No              | Yes      | Marker  |
| ^TH4                             | Lateral on thigh, between TH3 and TRO                                                                                                                                                       | Visualisation               | No              | Yes      | Marker  |
| ^KNL                             | At the bony prominence of the lateral femoral condyle, to form the lateral end of a 'knee axis' with ^KNM.                                                                                  | Palpation                   | Yes             | Yes      | Marker  |
| ^KNM                             | At the bony prominence of the medial femoral condyle, to form the medial end of a 'knee axis' with ^KNL.                                                                                    | Palpation                   | Yes             | No       | Marker* |
| ^VKNL                            | KNL projected by half marker radius in direction of KNM.                                                                                                                                    | Calculation                 | Yes             | No       | Derived |
| ^VKNM                            | KNM projected by half marker radius in direction of KNL.                                                                                                                                    | Calculation                 | Yes             | No       | Derived |
| ^KJC                             | Mid point between KNL and KNM.                                                                                                                                                              | Calculation                 | Yes             | No       | Derived |
| ^SHA1-4                          | Set of four markers placed anteriorly and posteriorly on lower 1/3 of the shank positioned to avoid excessive rotation due to individual tendon/muscle protrusion on dorsi/plantar flexion. | Visualisation               | No              | Yes      | Marker  |
| ^ANL                             | At most lateral point on lateral malleolus, to form the lateral end of the 'ankle' axis with ^ANM.                                                                                          | Palpation                   | Yes             | No       | Marker  |
| ^ANM                             | At most medial point on medial malleolus, to form the medial end of the 'ankle' axis with ^ANL.                                                                                             | Palpation                   | Yes             | No       | Marker* |
| ^VANL                            | ANL projected by half marker radius in direction of ANM.                                                                                                                                    | Calculation                 | Yes             | No       | Derived |
| ^VANM                            | ANM projected by half marker radius in direction of ANL.                                                                                                                                    | Calculation                 | Yes             | No       | Derived |
| ^AJC                             | Mid point between ANL and ANM                                                                                                                                                               |                             |                 |          |         |
| ^TOE                             | At a point approximating position of second metatarsal head on dorsum of shoe                                                                                                               | Palpation<br>/Visualisation | Yes             | Yes      | Marker  |
| ^MT1                             | On dorsum of shoe at a point approximating position of first metatarsal head.                                                                                                               | Palpation<br>/Visualisation | Kinetic<br>only | Yes      | Marker  |
| ^MT5                             | On dorsum of shoe at a point approximating position of fifth metatarsal head.                                                                                                               | Palpation<br>/Visualisation | Kinetic<br>only | Yes      | Marker  |
| ^FT3                             | On dorsum of shoe proximal to MT1 and MT5.                                                                                                                                                  | Palpation<br>/Visualisation | No              | Yes      | Marker  |

| Landmark ID<br>(^bilateral/side) | Location                                                                                                                                                                             | Location<br>method            | Function   |          | Type        |
|----------------------------------|--------------------------------------------------------------------------------------------------------------------------------------------------------------------------------------|-------------------------------|------------|----------|-------------|
|                                  |                                                                                                                                                                                      |                               | Definition | Tracking |             |
| ^HEE                             | On heel counter, approximately 15mm from ground, centrally when viewing from a posterior position along the long axis of the shoe to form the longitudinal axis of the foot with TOE | Measurement<br>/Visualisation | Yes        | Yes      | Marker      |
| ^TOEvert                         | Projection of TOE onto laboratory floor.                                                                                                                                             | Calculation                   | Yes        | No       | Derived     |
| ^HEEvert                         | Projection of HEE onto laboratory floor.                                                                                                                                             | Calculation                   | Yes        | No       | Derived     |
| ^HEElat                          | Projection of HEEvert laterally in pelvis coordinate system.                                                                                                                         | Calculation                   | Yes        | No       | Derived     |
| STRN                             | Anterior and superficial to sternal notch                                                                                                                                            | Palpation                     | Yes        | Yes      | Marker      |
| XYPH                             | Superficial to xyphoid process                                                                                                                                                       | Palpation                     | Yes        | Yes      | Marker      |
| C7                               | Superficial to seventh cervical vertebra                                                                                                                                             | Palpation                     | Yes        | Yes      | Marker      |
| LUM                              | Lumbar region, superficial to the spine at point of maximum curvature.                                                                                                               | Palpation                     | Yes        | Yes      | Marker      |
| LowerTorso                       | Mid point between XYPH and LUM                                                                                                                                                       | Palpation                     | Yes        | No       | Marker      |
| UpperTorso                       | Mid point between STRN and C7                                                                                                                                                        | Palpation                     | Yes        | No       | Marker      |
| ^SHA                             | Anterior to the approximate shoulder joint centre.                                                                                                                                   | Palpation/<br>Visualisation   | Yes        | Yes      | Marker      |
| ^ACR                             | Vertically above the acromium process                                                                                                                                                | Palpation                     | Yes        | No       | Marker<br>* |
| ^SJC                             | Projection of SHA onto the plane made by R & LACR and the vertical projection of RACR.                                                                                               | Calculation                   | Yes        | No       | Derived     |
| ^UPA                             | On the posterior upper arm approximately half way between the shoulder and elbow.                                                                                                    | Visualisation                 | No         | Yes      | Marker      |
| ^ELL                             | Superficial to the lateral condyle, placed with the arm hanging to the side of the body                                                                                              | Palpation                     | Yes        | Yes      | Marker      |
| ^ELM                             | Approximately superficial to the medial condyle, placed with the arm hanging to the side of the body to form an axis through the elbow with ELL                                      | Palpation                     | Yes        | No       | Marker<br>* |
| ^VELL                            | ELL projected by half marker radius in direction of ELM                                                                                                                              | Calculation                   | Yes        | No       | Derived     |
| ^VELM                            | ELM projected by half marker radius in direction of ELL                                                                                                                              | Calculation                   | Yes        | No       | Derived     |
| ^EJC                             | Mid point between ELL and ELM                                                                                                                                                        | Calculation                   | Yes        | No       | Derived     |
| ^HA1                             | Between 1 <sup>st</sup> and 2 <sup>nd</sup> metacarpals, approximately 15mm from the metacarpal heads.                                                                               | Palpation                     | Yes        | Yes      | Marker      |
| ^HA2                             | On the radial process of the wrist, to form a 'wrist axis' through the joint with HA3.                                                                                               | Palpation                     | Yes        | Yes      | Marker      |
| ^HA3                             | On the ulnar process of the wrist, to form a 'wrist axis' through the joint with HA2.                                                                                                | Palpation                     | Yes        | Yes      | Marker      |
| ^VHA2                            | HA2 projected by half marker radius in direction of HA3                                                                                                                              | Calculation                   | Yes        | No       | Derived     |

| Landmark ID<br>(^bilateral/side) | Location                                                                                                                                   | Location<br>method          | Function   |          | Type    |
|----------------------------------|--------------------------------------------------------------------------------------------------------------------------------------------|-----------------------------|------------|----------|---------|
|                                  |                                                                                                                                            |                             | Definition | Tracking |         |
| ^VHA3                            | HA3 projected by half marker radius in direction of HA2                                                                                    | Calculation                 | Yes        | No       | Derived |
| ^FIN                             | HA1 projected distally 0.5*distance between HA1 and midpoint of HA2 and HA3, along the line formed by HA1 and then midpoint of HA2 and HA3 | Calculation                 | Yes        | No       | Derived |
| ^FHD                             | On band approximately 2 cm above brow line, vertically above corner of eye                                                                 | Visualisation               | Yes        | Yes      | Marker  |
| ^BHD                             | On band approximately 2 cm laterally of bony protrusion on back of head                                                                    | Palpation/<br>Visualisation | Yes        | Yes      | Marker  |
| ^HEC                             | Mid point of line between FHD and BHD                                                                                                      | Calculation                 | Yes        | No       | Derived |
| LFHD_proj                        | LFHD projected backwards in global coordinate system by 0.05m                                                                              | Calculation                 | Yes        | No       | Derived |
| ^HEP                             | HEC projected (upwards) onto plane defined by RFHD, LFHD and LFHD_proj                                                                     | Calculation                 | Yes        | No       | Derived |

\* Marker removed following static calibration trial

**Table S3. Segment definitions**

| Segment<br>(^bilateral/<br>side)        | Landmarks<br>(derived landmarks in<br>parentheses)                                       | Origin                                                  | Axes                                                                                 |                                               |                                                                                                             | Geometry*<br>Joint radii                                                                            | Tracking<br>markers                               |
|-----------------------------------------|------------------------------------------------------------------------------------------|---------------------------------------------------------|--------------------------------------------------------------------------------------|-----------------------------------------------|-------------------------------------------------------------------------------------------------------------|-----------------------------------------------------------------------------------------------------|---------------------------------------------------|
|                                         |                                                                                          |                                                         | Flex/ext                                                                             | Add/abd                                       | Axial                                                                                                       |                                                                                                     |                                                   |
| Pelvis (V3D<br>Composite <sup>a</sup> ) | LASI, RASI,<br>LPSI, RPSI,<br>LAS2, RAS2,<br>(LVASI),<br>(RVASI),<br>(LVPSI),<br>(RVPSI) | Midpoint<br>between<br>LVASI<br>and<br>RVASI<br>markers | Parallel to line from<br>origin to RVASI                                             | Orthogonal to the<br>flex/ext and axial axes. | Perpendicular to<br>the plane defined<br>by LVASI,<br>RVASI & the<br>midpoint between<br>LVPSI and<br>RVPSI | See <sup>a</sup>                                                                                    | LASI, RASI,<br>LPSI, RPSI,<br>LAS2, RAS2,<br>VSAC |
| ^ Thigh                                 | (VKNL),<br>(VKNM), TRO,<br>TH1, TH2, TH3,<br>KNL (HJC)                                   | HJC                                                     | Perpendicular to<br>axial axis in plane<br>defined by HJC,<br>VKNL and VKNM          | Orthogonal to axial<br>and flex/ext axes      | Line joining HJC<br>and midpoint<br>between VKNL<br>and VKNM                                                | Proximal: half<br>distance between<br>RTRO and LTRO                                                 | TRO, TH1-4,<br>KNL <sup>b</sup>                   |
| ^ Shank                                 | (KJC), (VANL),<br>(VANM), ANL,<br>SK1-4                                                  | KJC                                                     | Perpendicular to<br>axial axis in plane<br>defined by KJC,<br>VANL and VANM          | Orthogonal to Axial<br>and Flex/Ext axes      | Line joining KJC<br>and midpoint<br>between VANL<br>and VANM                                                | Proximal: half<br>distance between<br>VANL and VANM                                                 | SK1-4, KNL,<br>ANL <sup>b</sup>                   |
| ^ Foot                                  | (AJC), (VANL),<br>TOE, LHL,<br>HEE, MT5                                                  | AJC                                                     | Perpendicular to<br>axial axis in plane<br>defined by AJC,<br>VANL and TOE           | Orthogonal to Axial<br>and Flex/Ext axes      | Line joining AJC<br>and TOE                                                                                 | Proximal : distance<br>between AJC and<br>VANL, Distal :<br>half distance<br>between MT1 and<br>MT5 | TOE, HEE,<br>MT1, MT5,<br>FT3                     |
| ^ KMAT Foot                             | (HEEvert),<br>(TOEvert),<br>(HEElat), TOE,<br>LHL, HEE, MT5                              | HEEvert                                                 | Perpendicular to<br>axial axis in plane<br>defined by HEEvert,<br>TOEvert and HEElat | Line joining HEEvert<br>and TOEvert           | Orthogonal to<br>Add/Abd and<br>Flex/Ext axes                                                               | NA                                                                                                  | TOE, HEE,<br>MT1, MT5,<br>FT3                     |

| Segment<br>(^bilateral/<br>side) | Landmarks<br>(derived landmarks in<br>parentheses)          | Origin                                     | Axes                                                                                                           |                                          |                                                                     | Geometry*<br>Joint radii                                                                                                                                            | Tracking<br>markers             |
|----------------------------------|-------------------------------------------------------------|--------------------------------------------|----------------------------------------------------------------------------------------------------------------|------------------------------------------|---------------------------------------------------------------------|---------------------------------------------------------------------------------------------------------------------------------------------------------------------|---------------------------------|
|                                  |                                                             |                                            | Flex/ext                                                                                                       | Add/abd                                  | Axial                                                               |                                                                                                                                                                     |                                 |
| Thorax                           | (UpperTorso),<br>(LowerTorso),<br>STRN, XYPH,<br>C7, LUM.   | Upper<br>Torso                             | Perpendicular to<br>axial axis,<br>orthogonal to plane<br>defined by<br>UpperTorso,<br>LowerTorso and<br>STRN. | Orthogonal to Axial<br>and Flex/Ext axes | Line joining<br>UpperTorso and<br>LowerTorso                        | Proximal : half<br>distance between<br>RSJC and LSJC<br>Distal : half<br>distance between<br>RASI and LASI                                                          | STRN,<br>XYPH, C7,<br>LUM       |
| ^ Upper Arm                      | (SJC), UPA,<br>(VELL),<br>(VELM), SHA,<br>ELL               | SJC                                        | Perpendicular to<br>axial axis in plane<br>defined by SJC,<br>VELL and VELM                                    | Orthogonal to Axial<br>and Flex/Ext axes | Line joining SJC<br>to mid point<br>between VELL<br>and VELM        | Proximal : distance<br>between SJC and<br>ACR                                                                                                                       | SHA, UPA,<br>ELL                |
| ^ Forearm                        | (EJC), (VHA2),<br>(VHA3), ELL,<br>HA2, HA3                  | EJC                                        | Perpendicular to<br>axial axis in plane<br>defined by EJC,<br>VHA2 and VHA3                                    | Orthogonal to Axial<br>and Flex/Ext axes | Line joining EJC<br>to mid point<br>between VHA2<br>and VHA3        | Proximal : distance<br>between VELL and<br>VELM                                                                                                                     | ELL, HA2,<br>HA3                |
| Hand                             | (FIN), HA1,<br>HA2, HA3,<br>(VHA2),<br>(VHA3)               | Midpoint<br>between<br>VHA2<br>and<br>VHA3 | Perpendicular to<br>axial axis in plane<br>defined by FIN,<br>VHA2 and VHA3                                    | Orthogonal to Axial<br>and Flex/Ext axes | Line joining FIN<br>and midpoint<br>between VHA2<br>and VHA3        | Distal : half<br>distance between<br>VHA2 and VHA3                                                                                                                  | HA1, HA2,<br>HA3                |
| Head                             | (RHE),(LHE),<br>(Upper Torso),<br>LFHD, RFHD,<br>LBHD, RBHD | Mid point<br>between<br>RHE and<br>LHE     | Perpendicular to<br>axial axis in plane<br>defined by RHE,<br>LHE and Upper<br>Torso                           | Orthogonal to Axial<br>and Flex/Ext axes | Line joining mid<br>point between<br>RHE and LHE<br>and Upper Torso | Proximal : Half<br>distance between<br>LFHD and LBHD<br>minus 1 marker<br>diameter. Depth :<br>half distance<br>between LFHD and<br>LBHD minus 1<br>marker diameter | LFHD,<br>RFHD,<br>LBHD,<br>RBHD |

<sup>a</sup> See [http://www.c-motion.com/v3dwiki/index.php?title=V3D\\_Composite\\_Pelvis](http://www.c-motion.com/v3dwiki/index.php?title=V3D_Composite_Pelvis)

<sup>b</sup> Data from repeatedly obscured markers excluded. Segments tracked with at least 3 non-collinear markers including at least 1 anterior and 1 posterior placed marker.

**Table S4. Joint definitions / rotation sequences**

| <b>Joint / Segment angle name<sup>a</sup><br/>(*bilateral)</b> | <b>Segment<sup>b</sup></b> | <b>Reference segment<sup>b</sup></b> | <b>Cardan sequence</b>                | <b>Positive direction</b>                                           |
|----------------------------------------------------------------|----------------------------|--------------------------------------|---------------------------------------|---------------------------------------------------------------------|
| Pelvis                                                         | Pelvis                     | Laboratory                           | Flex/ext - add/abd - int/ext rotation | Tilt – anterior<br>Obliquity – right down<br>Twist – right forwards |
| Hip*                                                           | Thigh                      | Pelvis                               | Flex/ext - add/abd - int/ext rotation | Flexion<br>Adduction<br>Internal rotation                           |
| Knee*                                                          | Shank                      | Thigh                                | Flex/ext - add/abd - int/ext rotation | Flexion<br>Adduction<br>Internal rotation                           |
| Ankle*                                                         | Foot                       | Shank                                | Flex/ext-add/abd-inv/ev rotation      | Dorsiflexion<br>Adduction<br>Inversion                              |
| Virtual Ankle*                                                 | Virtual Foot               | Virtual Shank                        | Flex/ext-inv/ev-add/abd               | Dorsiflexion<br>Inversion<br>Adduction                              |

<sup>a</sup> Virtual segments are used for joint kinematics only.

<sup>b</sup> Angles are calculated within the co-ordinate system of the reference segment.

**Table S5. System**

|                                  |                                                                                            |
|----------------------------------|--------------------------------------------------------------------------------------------|
| <b>Capture system / software</b> | Motion Analysis Corporation <sup>a</sup> : 17-camera Raptor/ Cortex version 6 <sup>a</sup> |
| <b>Medium</b>                    | Passive retro-reflective markers : 12.7mm with thin fabric base                            |
| <b>Sampling frequency</b>        | 100Hz                                                                                      |

**Table S6. Processing**

|                      | <b>Software</b>        | <b>Details</b>                                                     |
|----------------------|------------------------|--------------------------------------------------------------------|
| <b>Eventing</b>      | Visual 3D <sup>b</sup> | Kinematic algorithm (velocity-based, from <sup>4</sup> )           |
| <b>Filtering</b>     | Visual 3D <sup>b</sup> | 7Hz-12Hz 4 <sup>th</sup> order Butterworth, by marker <sup>5</sup> |
| <b>Interpolation</b> | Cortex <sup>a</sup>    | Cubic spline / software-based virtual join <sup>a</sup>            |

<sup>a</sup> Motion Analysis Corporation, Santa Rosa, CA, USA

<sup>b</sup> C-Motion, Germantown, MD, USA

<sup>c</sup> Mathworks, Natick, MA, USA

## References

<sup>1</sup> Spoor CW. Rigid body motion calculated from spatial co-ordinates of markers. *J. Biomech* 1980; 13: 391-393.

<sup>2</sup> Hanavan Jr, EP. A mathematical model of the human body (No. AFIT-GA-PHYS-64-3). Air Force Aerospace Medical Research Lab Wright-Patterson Afb Oh, 1964.

<sup>3</sup> Harrington ME, Zavatsky AB, Lawson SE, Yuan Z, Theologis TN. Prediction of the hip joint centre in adults, children, and patients with cerebral palsy based on magnetic resonance imaging. *J Biomech.* 2007;40(3):595-602.

<sup>4</sup> Zeni Jr, JA., Richards, JG, & Higginson, JS. Two simple methods for determining gait events during treadmill and overground walking using kinematic data. *Gait Posture* 2008, 27(4), 710-714.

<sup>5</sup> Giakas, G. Power spectrum analysis and filtering. *Innovative Analyses of Human Movement*, Champaign, IL: Human Kinetics, 2004.
